# Supplementary material for: CLARITY-compatible lipophilic dyes for electrode marking and neuronal tracing
Source: PubMed Central journal article supplement (PMC5011694; doi:10.1038/srep32674), 2016-09-06
Supplement: srep32674-s1.pdf [file srep32674-s1.pdf]

Supplementary material for:

## **CLARITY-compatible lipophilic dyes for electrode marking and neuronal tracing**

by Kristian H. R. Jensen<sup>1</sup> and Rune W. Berg<sup>1\*</sup>

<sup>1</sup>University of Copenhagen, Department of Neuroscience and Pharmacology,  
Copenhagen, DK-2200, Denmark

\*runeb@sund.ku.dk

Includes 4 figures and 1 table.

## Supplementary figure 1

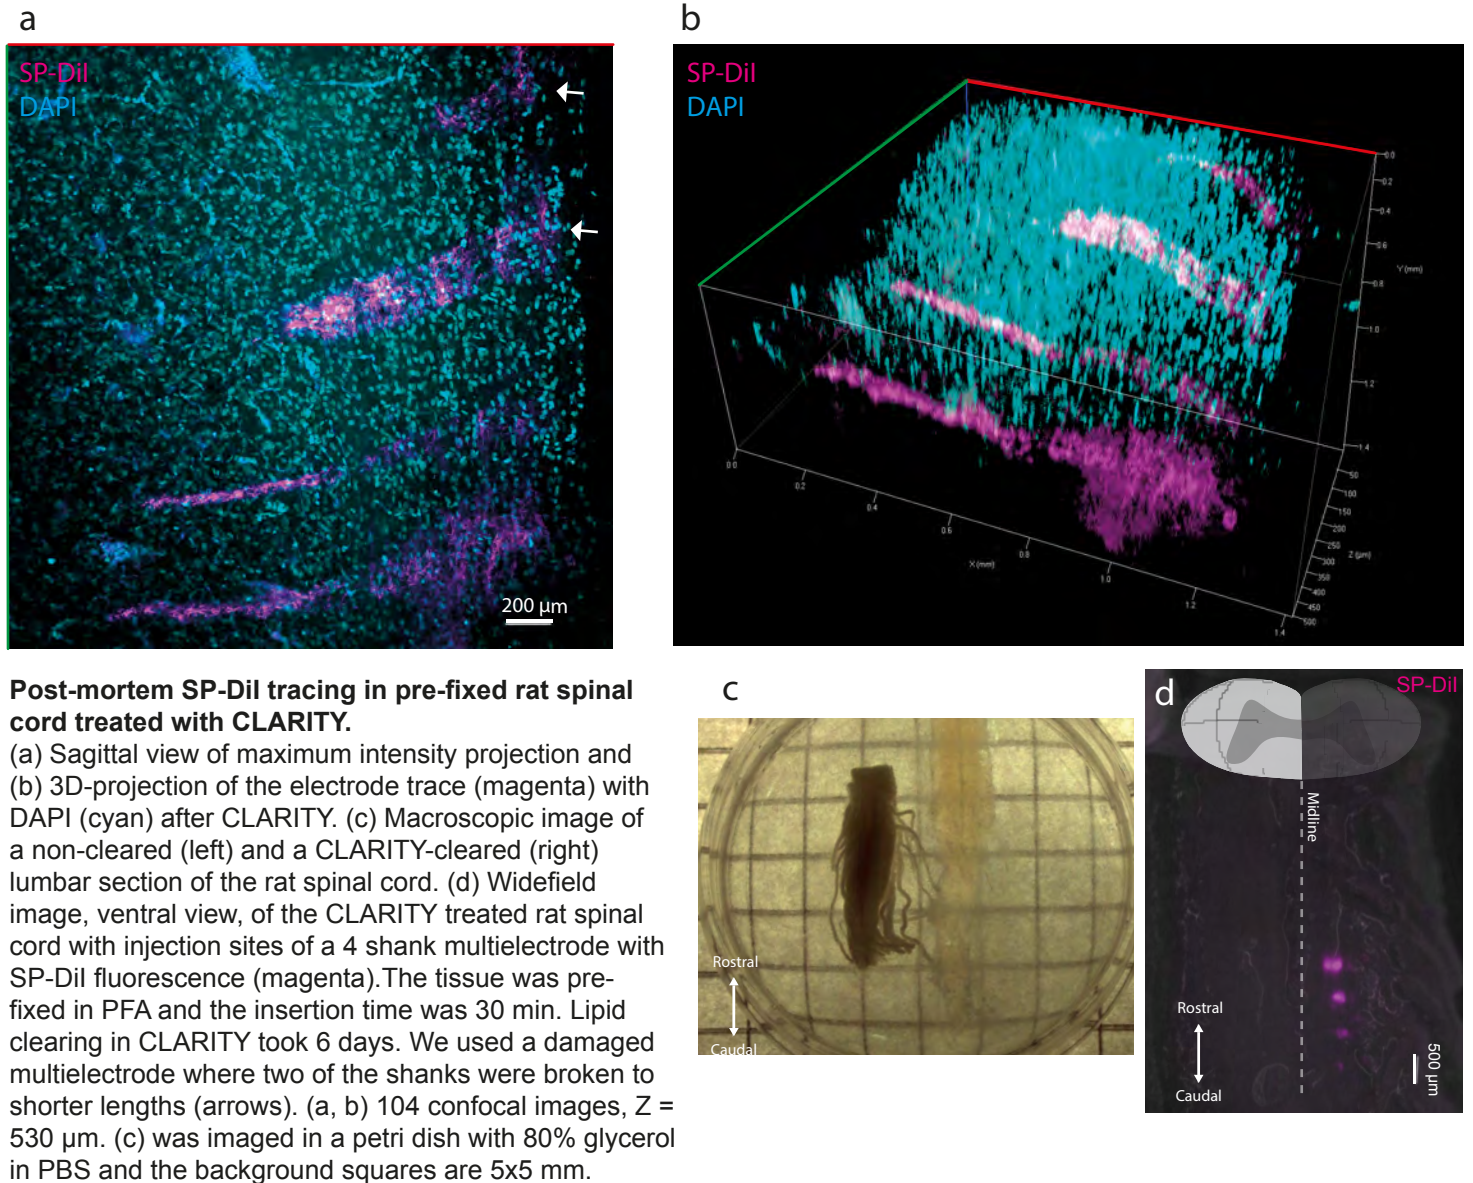

## Supplementary figure 2

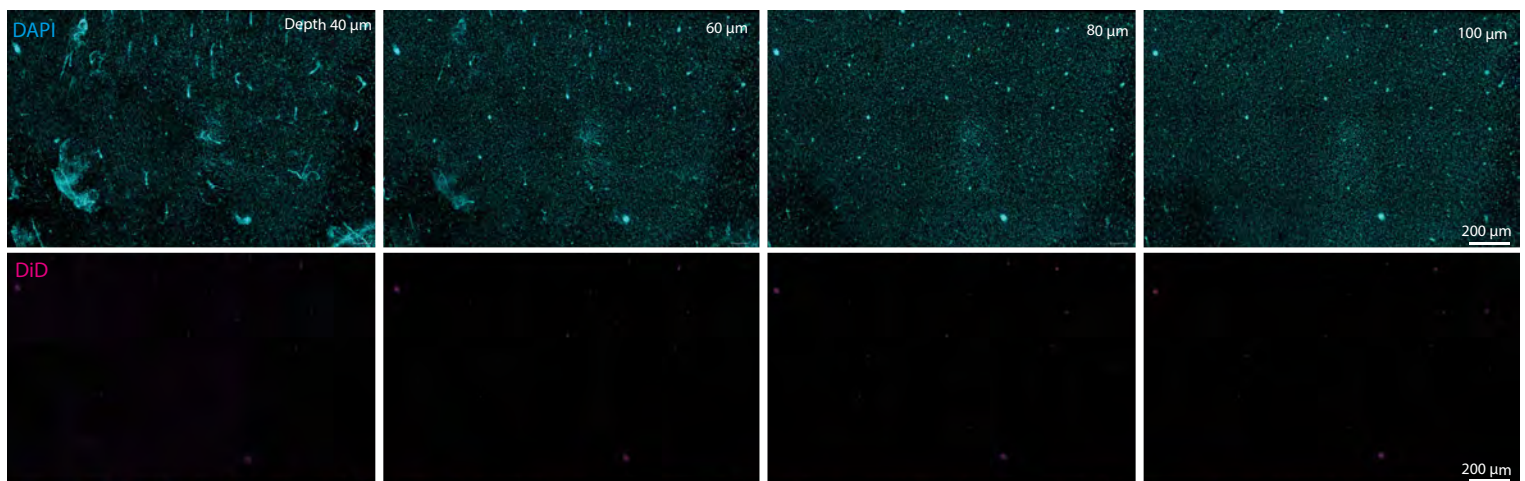



## Supplementary figure 3

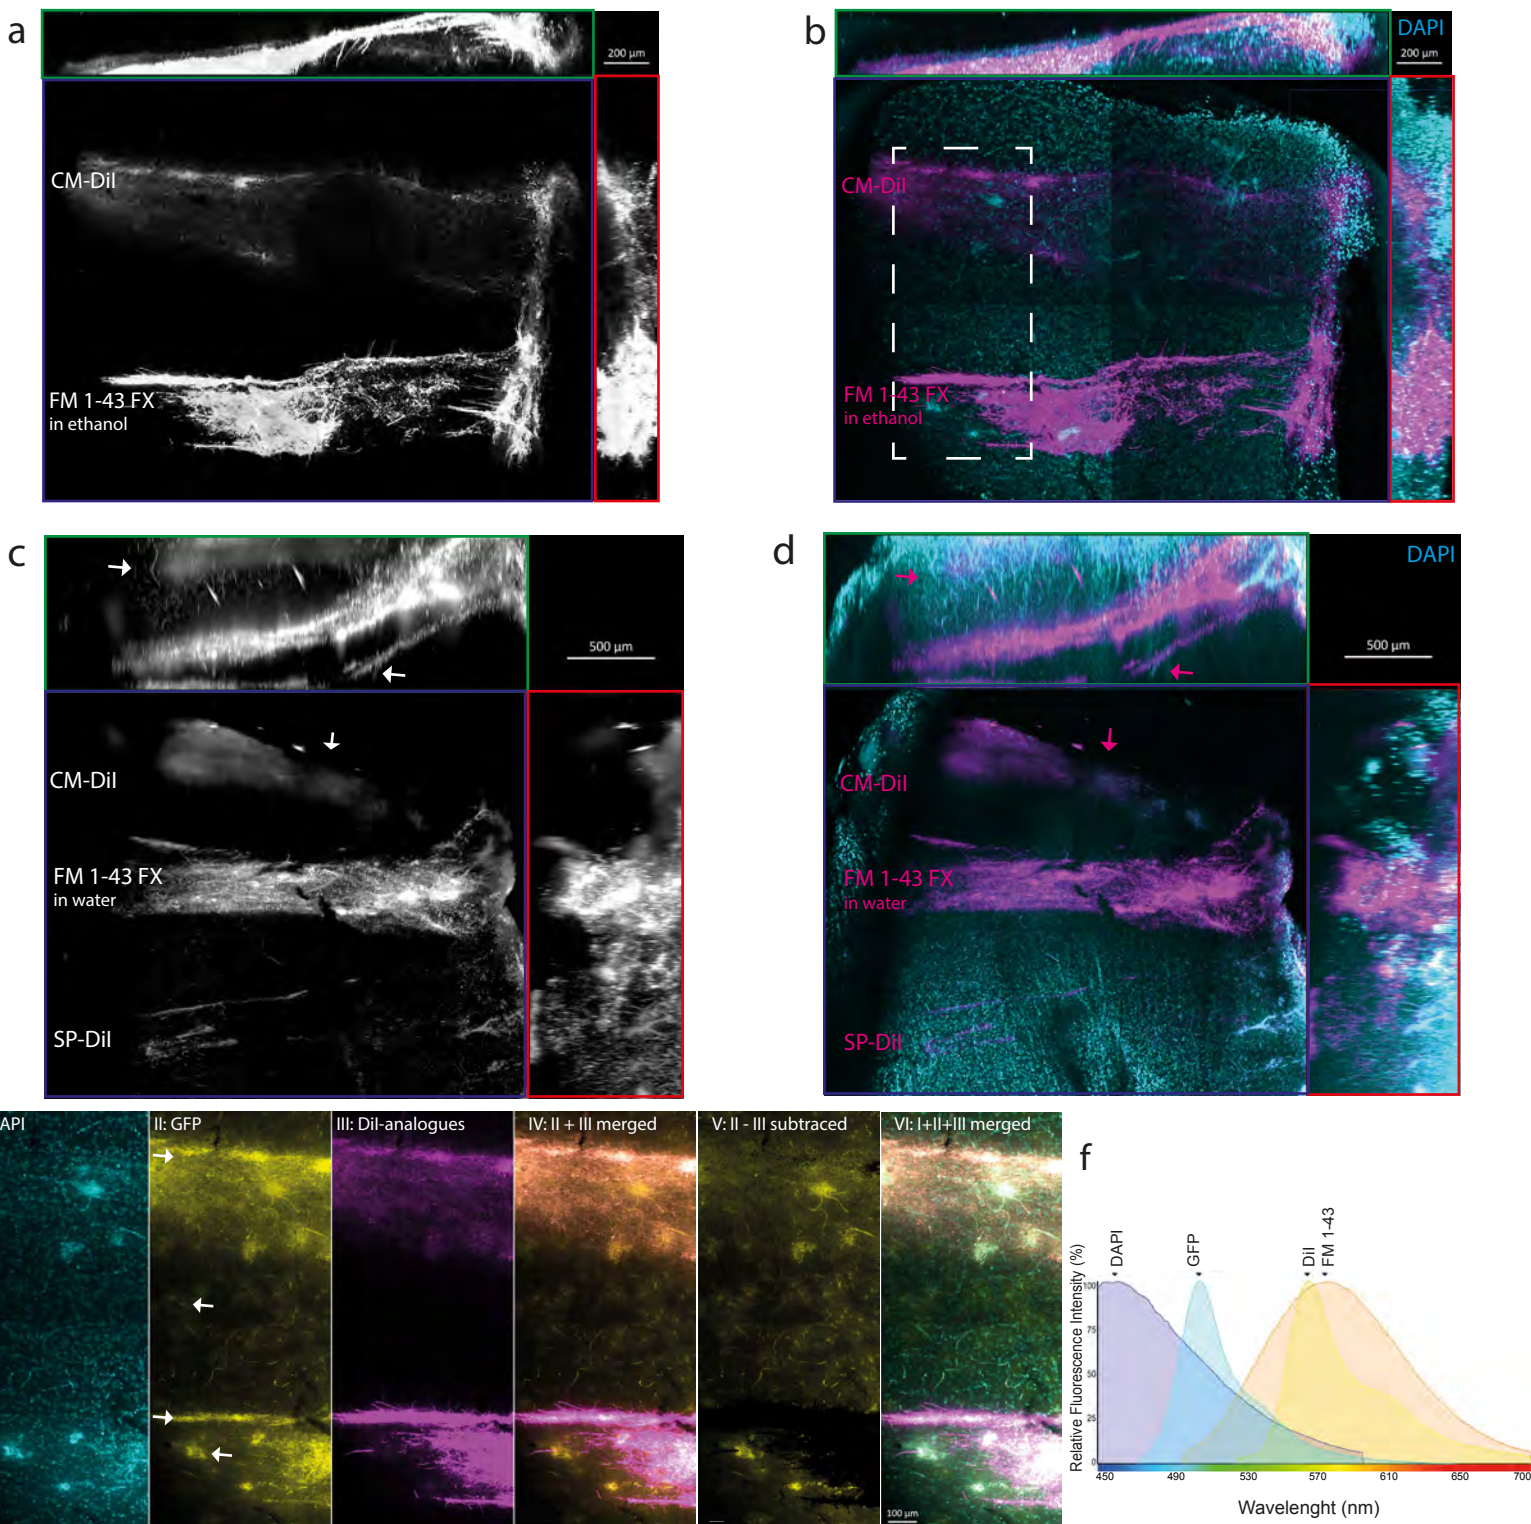

### Imaging Dil-analogues with GFP-expressing astrocytes shows spectral cross-talk.

Sagittal view of GFP-expressing mouse spinal cord. White traces are from a multielectrode with four shanks dipped in either CM-Dil dissolved in ethanol (a) FM 1-43FX in ethanol (a) or water (c), or SP-Dil in ethanol (c). Magenta traces in images (b) and (d) are (a) and (c), respectively, with a DAPI counterstain (cyan). Exposure time was 8 min and on the contralateral side of the spinal cord of the animal: (a, b) from the left side and (c, d) from the right side. The right side SP-Dil electrode insertion was the last shortly before the respiratory arrest of the animal. Notice the CM-Dil trace is located superficially (right-facing arrow) and close to the tissue cut end (downward arrow), which may contribute to the diffuse staining. Dissolving FM 1-43FX in ethanol (a) versus water (c) did not seem to make a difference in the degree of staining. The depth of the SP-Dil trace (left-facing arrow) contributes to the limited fluorescence captured in the image. (e) Closeup of the dashed box from (b) showing crosstalk between dyes. The panels include images (II) of the GFP-expressing astrocytes (left-facing arrows) not shown in the above images (a-d). Spectral crosstalk between GFP and the Dil is seen in (III, right-facing arrows), which was reduced by simple subtraction of the image of the Dil-analogues from the GFP image (V). The challenge in multi-channel imaging where both FM 1-43FX and DAPI have broad emission spectra overlapping with GFP (f) is evident in the merged images of all fluorophores (VI). (f) The emission spectra of DAPI, GFP, Dil and FM 1-43 in the 450-700 nm range (SpectraViewer, from the website of Thermo Fisher Science). All images are maximum intensity projections of Z(blue box), X(red box) and Y(green box) planes of the (a, b) 56 confocal image stack (2x2 tiles, Z = 269  $\mu$ m) and (c, d) 125 confocal image stack (2x2 tiles, Z = 866  $\mu$ m). The output of the exciting laser is the same for all tiles; there is a slight light fall-off at the tile edges.

## Supplementary figure 4

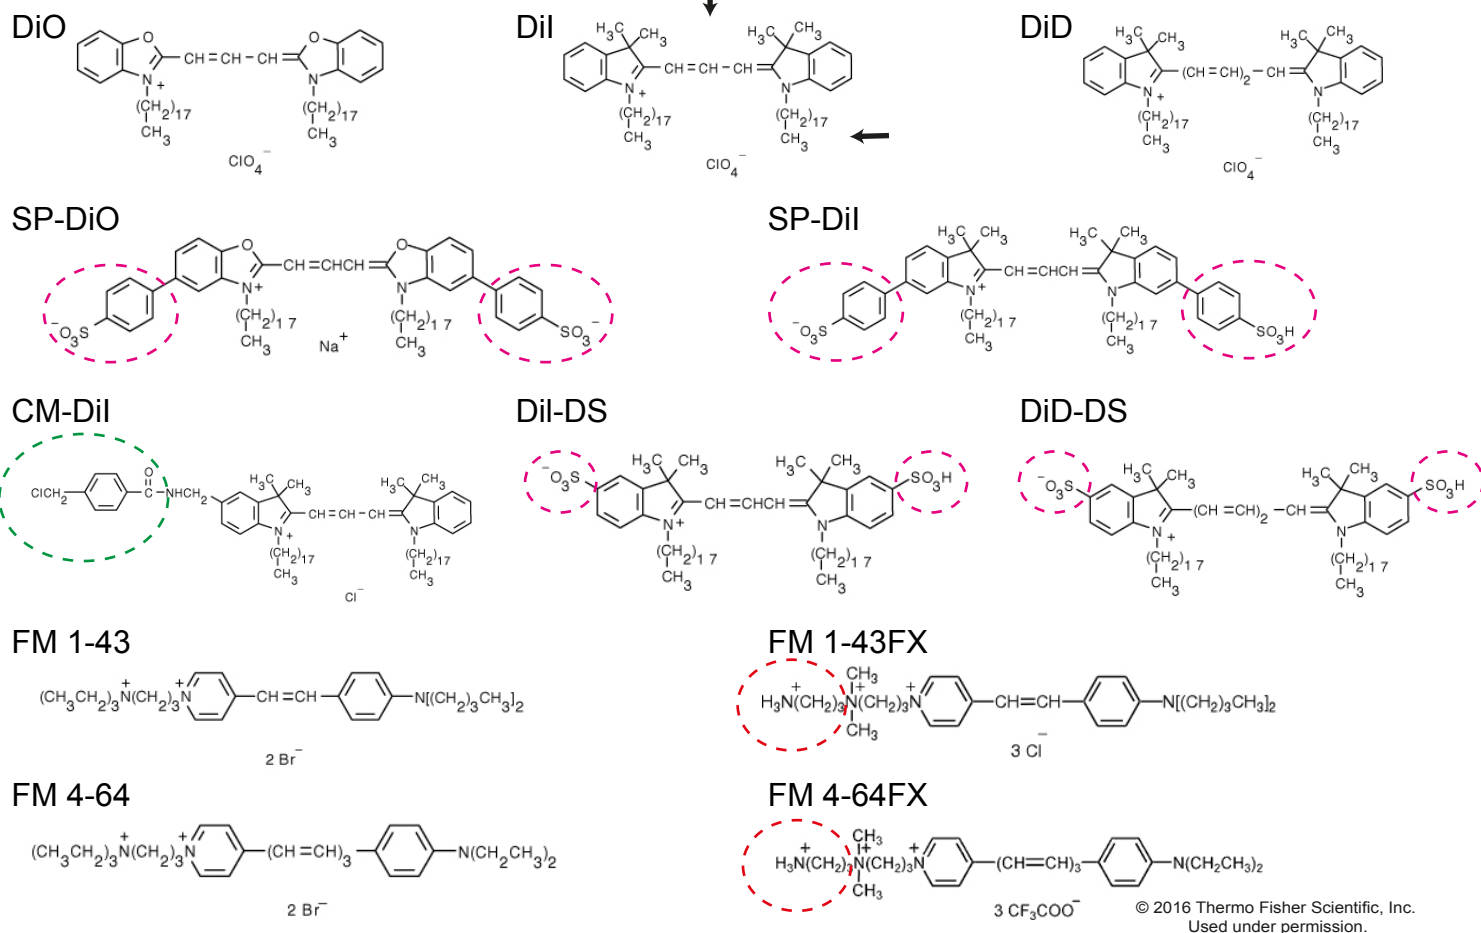

Fixable modifications:

Chloromethylbenzamido-

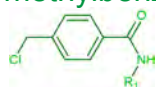

Sulfonated-

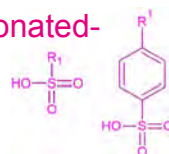

Aliphatic amine-

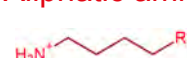

### Chemical structures of available DiI and FM dyes.

Modifications that ensure fixability (broken circles) shown in colours that indicate their modification. The derivatives of DiI with differing carbon bridge lengths between the indoline rings (vertical arrow) have different excitation and emission wavelengths e.g. DiD red-shifted version with a 5 rather than 3 carbon bridge. A substitute of carbon to oxygen in the indoline rings moves DiO to lower wavelengths. The lipophilic property is dependent on alkyl-chain lengths (horizontal arrow). FM 1-43 has a red-shifted variant, FM 4-64, with a 6 rather than 2 carbon bridge between the aromatic rings.

The images are the copyrighted property owned by Life Technologies Corporation, a part of Thermo Fisher Scientific Inc. [www.thermofisher.com](http://www.thermofisher.com)

## Supplementary table 1

### Overview of commercially available DiI and FM dyes†.

The dyes are grouped by type and modification. 1) FM 1-43 Ex = 479 nm, Em = 598 nm when bound to phospholipid bilayer membranes and Em = 565 nm when bound to synaptosomal membranes. 2) Ex, Em and ε determined for dye bound to detergent micelles (20 mg/ml CHAPS in H<sub>2</sub>O). These dyes are essentially nonfluorescent in pure water.

\*Spectral properties determined in methanol unless noted below. ε: Molar attenuation coefficient. †Modified from Molecular Probes Handbook (Thermo Science Fisher). Ex: excitation. Em: Emission.

| Trival name | Name                    | Fixable Modification | Molar mass<br>g/mol | Excitation*<br>nm | Emission*<br>nm | Stokes shift<br>nm | ε*<br>m <sup>2</sup> /mol |
|-------------|-------------------------|----------------------|---------------------|-------------------|-----------------|--------------------|---------------------------|
| DiO         | DiOC18(3)               |                      | 881.72              | 484               | 501             | 17                 | 154,000                   |
| DiI         | DiIC18(3)               |                      | 933.88              | 549               | 565             | 16                 | 148,000                   |
| DiD         | DiIC18(5)               |                      | 1052.08             | 644               | 663             | 19                 | 193,000                   |
| SP-DiO      | SP-DiOC18(3)            | sulfophenyl          | 1115.55             | 497               | 513             | 16                 | 175,000                   |
| DiI-DS      | DiIC18(3)-DS            | sulfonate            | 993.54              | 555               | 570             | 15                 | 144,000                   |
| SP-DiI      | SP-DiIC18(3)            | sulfophenyl          | 1145.73             | 556               | 573             | 17                 | 164,000                   |
| DiD-DS      | DiIC18(5)-DS            | sulfonate            | 1019.58             | 650               | 670             | 20                 | 247,000                   |
| CM-DiI      | CellTracker™ CM-DiI     | chloromethyl         | 1051.50             | 553               | 570             | 17                 | 134,000                   |
|             | FM@ 1-43 <sup>1</sup>   |                      | 611.55              | 471               | 581             | 110                | 38,000                    |
|             | FM@ 4-64 <sup>2</sup>   |                      | 607.51              | 505               | 725             | 220                | 47,000                    |
|             | FM@ 1-43FX <sup>1</sup> | aliphatic amine      | 560.09              | 471               | 581             | 110                | 38,000                    |
|             | FM@ 4-64FX <sup>2</sup> | aliphatic amine      | 788.75              | 505               | 725             | 220                | 47,000                    |
